# Supplementary material
Source: Springer Nature journal article supplement (https://www.springermedizin.de/resource/supplementary/13063_2013_1892_MOESM1_ESM.pdf/9620420)
Supplement: MOESM1 [file 9620420]

Number with adenoma aged 50 to 74 years (n = 997)

- Number of letters sent (n = 997)
- Letters excluded as received after recruitment had ended (n = 0)

Estimated 600 per annum diagnosed (at 22 months = 1100)

Responded 'No' (n = 345) (35%)

Did not respond (n = 160) (16%)

- Nil response (n = 160) (16%)
- Awaiting Reply (n = 0) (0%)

Estimated 'No'/Non-respond 30%

Responded 'Yes' (n = 492) (49%)

Estimated 70%

Changed mind/declined (n = 42) (9%)

Ineligible (n = 121) (25%) of those screened

- BMI <25 (n = 108) (22%)
- 'Yes' ineligible as reply received after study closing to recruitment. (n = 13) (3%)

Estimated 19%

Randomised (n = 329) (33%)

Target (n = 316)

Allocated to intervention (n = 163)

Target n = 158

Allocated to control (n = 166)

Target n = 158

Loss to follow-up

Dropped Out (n= 9)

- ◇ Health Issues (n = 2)
- ◇ Personal Reasons (n = 2)
- ◇ No reason given (n = 3)
- ◇ Unable to commit (n = 2)

Untraceable (n=0)

Withdrawn (n=0)

Loss to follow-up

Dropped Out (n= 4)

- ◇ Not comfortable with study (n = 1)
- ◇ No reason given (n = 2)
- ◇ Ill Health (n = 1)

Untraceable (n=0)

Withdrawn (n=0)

3 Month Follow-up (n = 153)

Unable to attend 3 month interview (n=1)\*

3 Month Follow-up (n = 161)

Unable to attend 3 month interview (n = 1)\*

Loss to follow-up

Dropped Out (n=6)

- ◇ No reason given (n = 2)
- ◇ Health Issues (n = 1)
- ◇ Moving down south (n = 1)
- ◇ Did not attend interview (n = 2)

Untraceable (n=0)

Withdrawn (n=0)

Lost to Follow-up

n=15

Estimated (n = 25)

Lost to Follow-up

n=9

Estimated (n = 25)

Loss to follow-up

Dropped Out (n = 5)

- ◇ No reason given (n=3)
- ◇ Health Issues (n = 1)
- ◇ Died (n = 1)

Untraceable (n=0)

Withdrawn (n=0)

12 Month Follow-up (n = 148)

Target n=133

12 Month Follow-up (n = 157)

Target n=133
